# Supplementary material for: The interplay of thermodynamics and kinetics: imparting hierarchical control over film formation of self-stratified blends
Source: Royal Society of Chemistry journal article supplement (doi:10.1039/c9sm01147a), 2019-12-30
Supplement: c9sm01147a1.pdf [file c9sm01147a1.pdf]

## **Supplementary Information**

# **The interplay of thermodynamics and kinetics: Imparting hierarchical control over film formation of self- stratified blends**

**The interplay of thermodynamics and kinetics:  
Imparting hierarchical control over film formation of self-stratified blends**

Samantha J. Rinehart<sup>1</sup>, Guangcui Yuan<sup>2,3</sup>, and Mark D. Dadmun<sup>1,4</sup>

<sup>1</sup>Department of Chemistry, University of Tennessee, Knoxville, Tennessee 37996

<sup>2</sup>NIST Center for Neutron Research, National Institute of Standards and Technology, Gaithersburg,  
Maryland 20899

<sup>3</sup>University of Georgetown, Washington D.C. 20057

<sup>4</sup>Chemical Sciences Division, Oak Ridge National Laboratory, Oak Ridge, Tennessee 37830

The volume fraction depth profiles for all of the blend compositions for the three largest dPMMA molecular weights prepared at 209.4 rad/s (Supplemental Figures S1-S3).

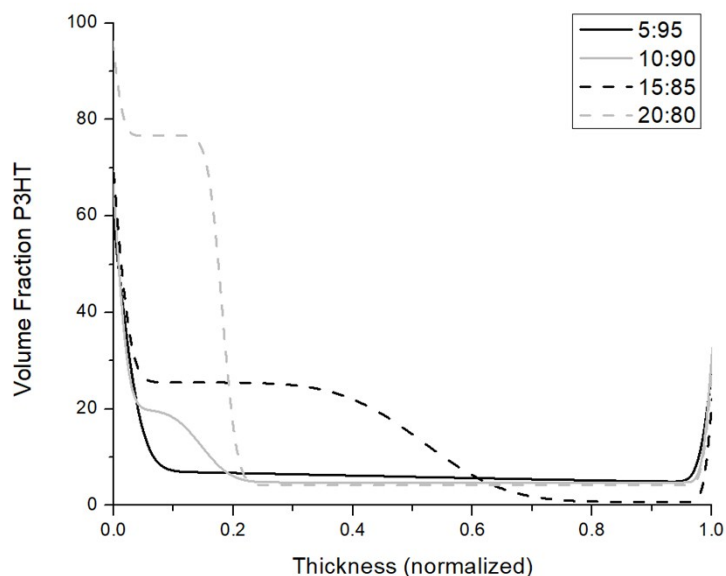

**Supplemental Figure S1:** P3HT volume fraction depth profiles of P3HT:131,500 g/mol dPMMA 5:95 (black solid line), 10:90 (grey solid line), 15:85 (black dashed line), 20:80 (grey dashed line) blends spin cast from chlorobenzene at 209.4 rad/s where 0 is the air interface and 1 is the SiO<sub>2</sub>.

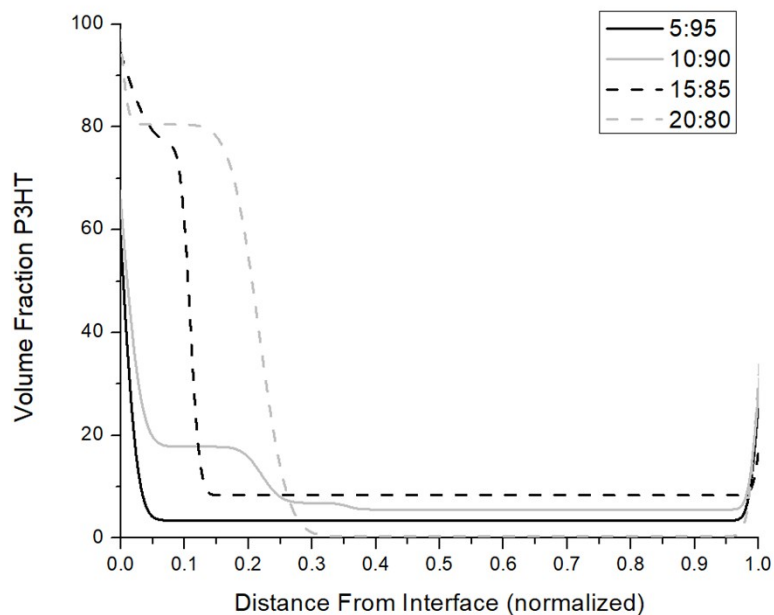

**Supplemental Figure S2:** P3HT volume fraction depth profiles of P3HT:316,000 g/mol dPMMA 5:95 (black solid line), 10:90 (grey solid line), 15:85 (black dashed line), 20:80 (grey dashed line) blends spin cast from chlorobenzene at 209.4 rad/s where 0 is the air interface and 1 is the SiO<sub>2</sub>.

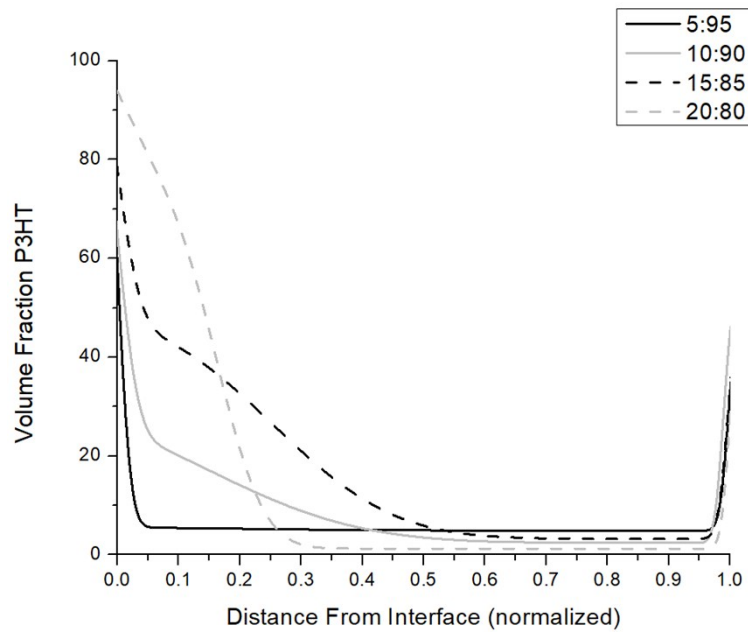

**Supplemental Figure S3:** P3HT volume fraction depth profiles of P3HT:520,000 g/mol dPMMA 5:95 (black solid line), 10:90 (grey solid line), 15:85 (black dashed line), 20:80 (grey dashed line) blends spin cast from chlorobenzene at 209.4 rad/s where 0 is the air interface and 1 is the SiO<sub>2</sub>.
